# Supplementary material
Source: PubMed Central journal article supplement (PMC6624803)
Supplement: jamadermatol-155-789-s001.pdf [file jamadermatol-155-789-s001.pdf]

## Supplementary Online Content

Colboc H, Moguelet P, Bazin D, et al; for the Groupe Angio-Dermatologie of the French Society of Dermatology. Localization, morphologic features, and chemical composition of calciphylaxis-related skin deposits in patients with calcific uremic arteriopathy. *JAMA Dermatol*. Published online May 22, 2019. doi:10.1001/jamadermatol.2019.0381

**eTable.** Univariate and Multivariate Analyses for the Risk of Death Related to CUA

This supplementary material has been provided by the authors to give readers additional information about their work.

**eTable.** Univariate and Multivariate Analyses for the Risk of Death Related to CUA

| Risk factor                         | Calcific uremic arteriopathy |                | OR (95% CI)      | P value    |              |
|-------------------------------------|------------------------------|----------------|------------------|------------|--------------|
|                                     | Nonsurvivors                 | Survivors      |                  | Univariate | Multivariate |
| Female vs male                      | 28.6% vs 85.7%               | 71.4% vs 14.3% | 15 (1.47–152.5)  | .0228      | .019         |
| Age at diagnosis (years)            | 61.5 [33–88]                 | 65 [49–89]     | –                | .36        | –            |
| Proximal vs distal CUA              | 50% vs 38.9%                 | 50% vs 61.1%   | 1.57 (0.33–7.48) | .57        | –            |
| Dialysis at diagnosis (yes vs no)   | 43.4% vs 40%                 | 56.6% vs 60%   | 1.15 (0.16–8.2)  | 1          | –            |
| Hypertension (yes vs no)            | 42.3% vs 50%                 | 57.7% vs 50%   | 0.73 (0.04–13)   | 1          | –            |
| Diabetes (yes vs no)                | 42.1% vs 44.4%               | 57.9% vs 55.6% | 0.91 (0.18–4.5)  | 1          | –            |
| Obesity (yes vs no)                 | 28.6% vs 57.1%               | 71.4% vs 42.9% | 0.3 (0.06–1.44)  | .25        | –            |
| Ischemic cardiomyopathy (yes vs no) | 30% vs 50%                   | 70% vs 50%     | 0.43 (0.08–2.2)  | .43        | –            |
| Vitamin K antagonists (yes vs no)   | 42.9% vs 42.9%               | 57.1% vs 57.1% | 1 (0.22–4.47)    | 1          | –            |

|                                                                  |                  |                  |                    |      |      |
|------------------------------------------------------------------|------------------|------------------|--------------------|------|------|
| Livedo reticularis (yes vs no)                                   | 46.2% vs 40%     | 53.8% vs 60%     | 1.29 (0.29–5.78)   | .74  | –    |
| Ulceration (yes vs no)                                           | 45% vs 37.5%     | 55% vs 62.5%     | 1.36 (0.25–7.32)   | 1    | –    |
| Nodular lesions (yes vs no)                                      | 83.3% vs 31.8%   | 16.7% vs 68.2%   | 10.7 (1.04–109.78) | .053 | .038 |
| Indurated plaque (yes vs no)                                     | 40% vs 44.4%     | 60% vs 55.6%     | 0.83 (0.17–4)      | 1    | –    |
| Vascular thrombosis                                              | 30.4% vs 40%     | 69.6% vs 60%     | 1.04 (0.14–7.93)   | 1    | –    |
| Interstitial calcifications in biopsy (yes vs no)                | 33.3% vs 60%     | 66.7% vs 40%     | 0.33 (0.04–2.56)   | .34  | –    |
| Serum calcium (mmol/L)                                           | 2.34 [2.14–2.65] | 2.35 [1.98–2.84] | –                  | .86  |      |
| Serum phosphate (mmol/L)                                         | 1.8 [0.98–2.81]  | 1.51 [0.93–3.68] | –                  | .7   | –    |
| Calcium × phosphate product (mmol <sup>2</sup> /L <sup>2</sup> ) | 4.37 [2.22–6.83] | 3.57 [1.87–8.65] | –                  | .7   | –    |
| Parathormone (pg/mL)                                             | 156 [19–1043]    | 261.5 [0.8–931]  | –                  | .91  | –    |
| Albuminemia (g/L)                                                | 27 [18–43.6]     | 29.1 [21–36.2]   | –                  | .75  | –    |

Data are expressed as median [range], unless stated otherwise.

CUA, calcific uremic arteriopathy; OR: odds ratio; CI: confidence interval.
